# Supplementary material
Source: PubMed Central journal article supplement (PMC9098148)

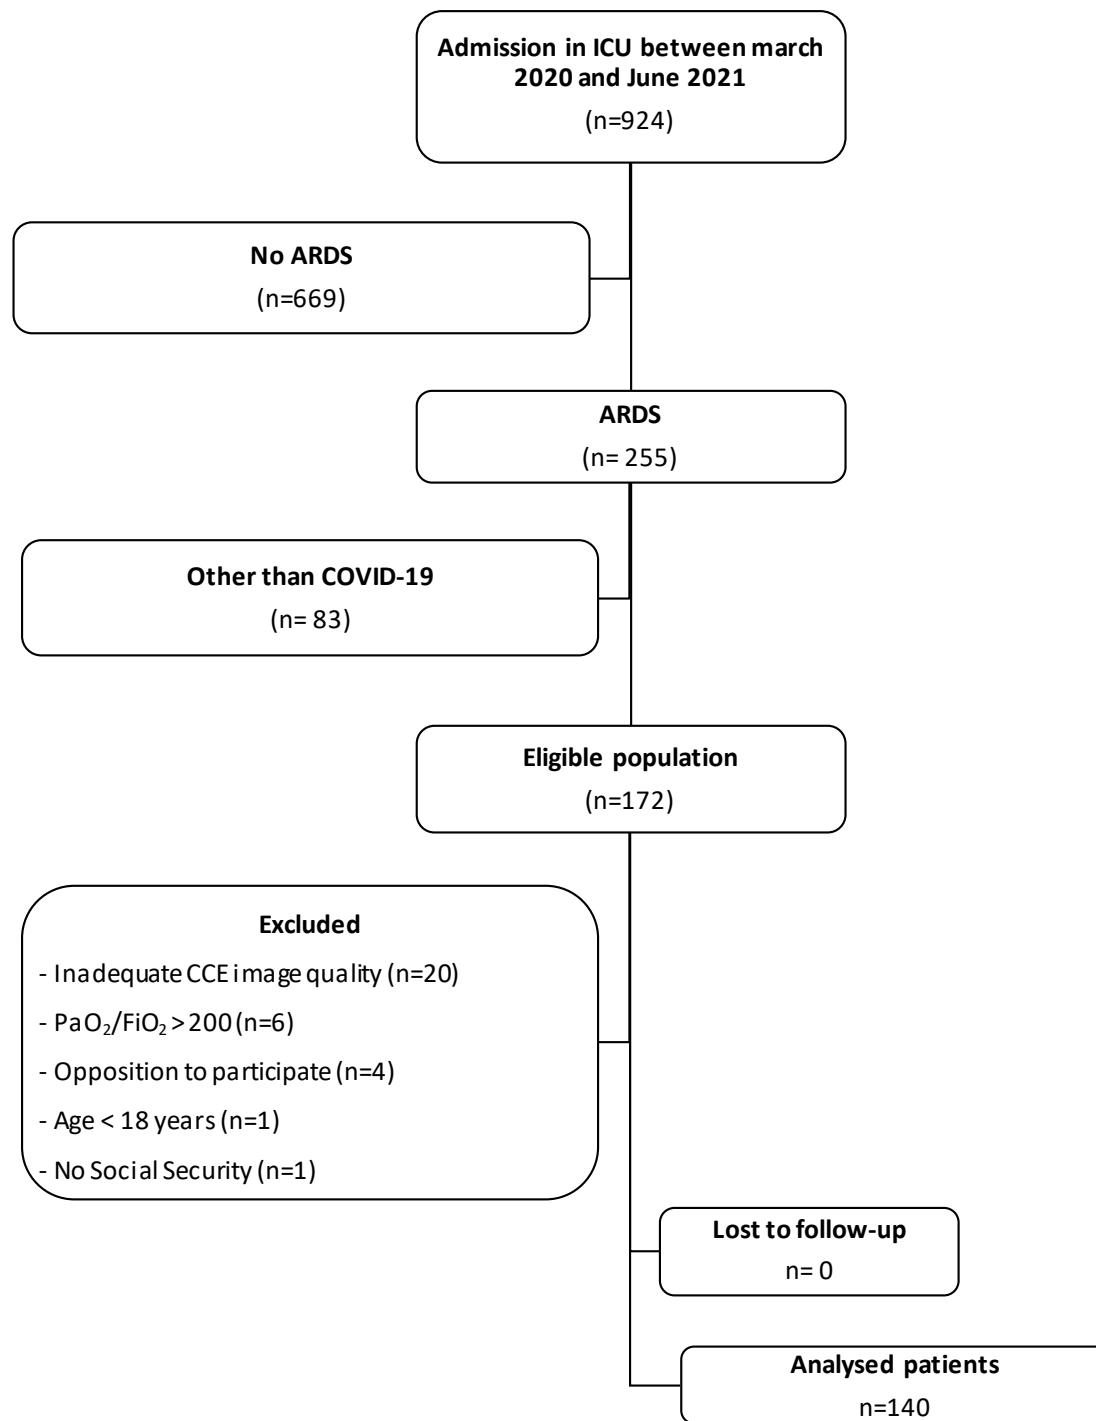

Figure E1

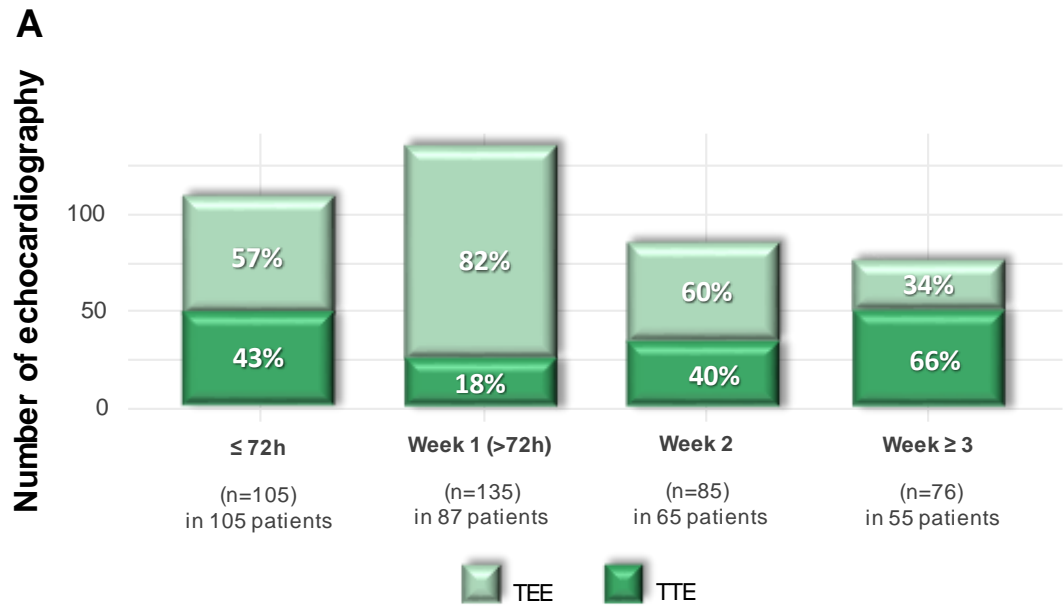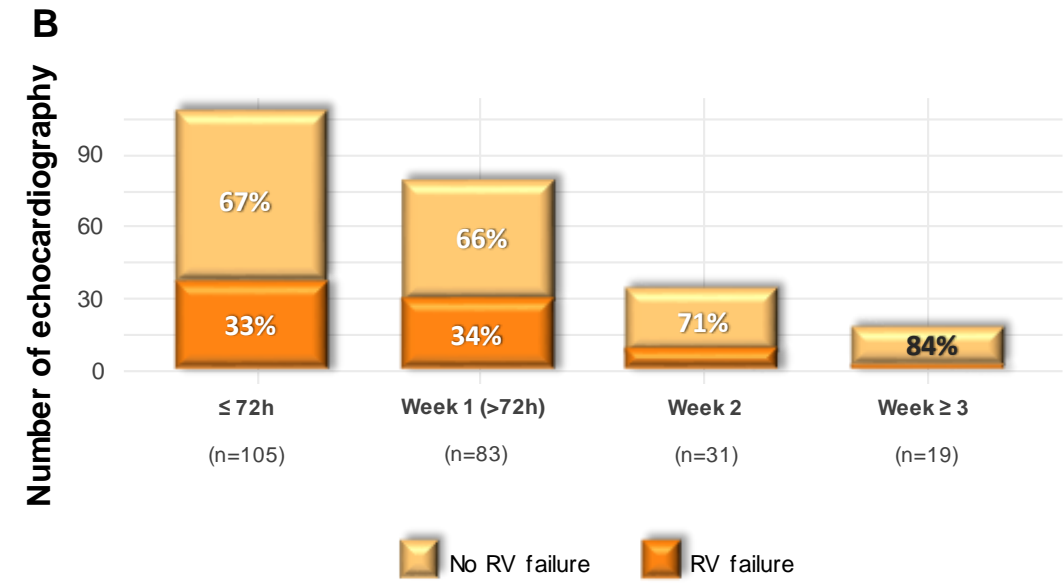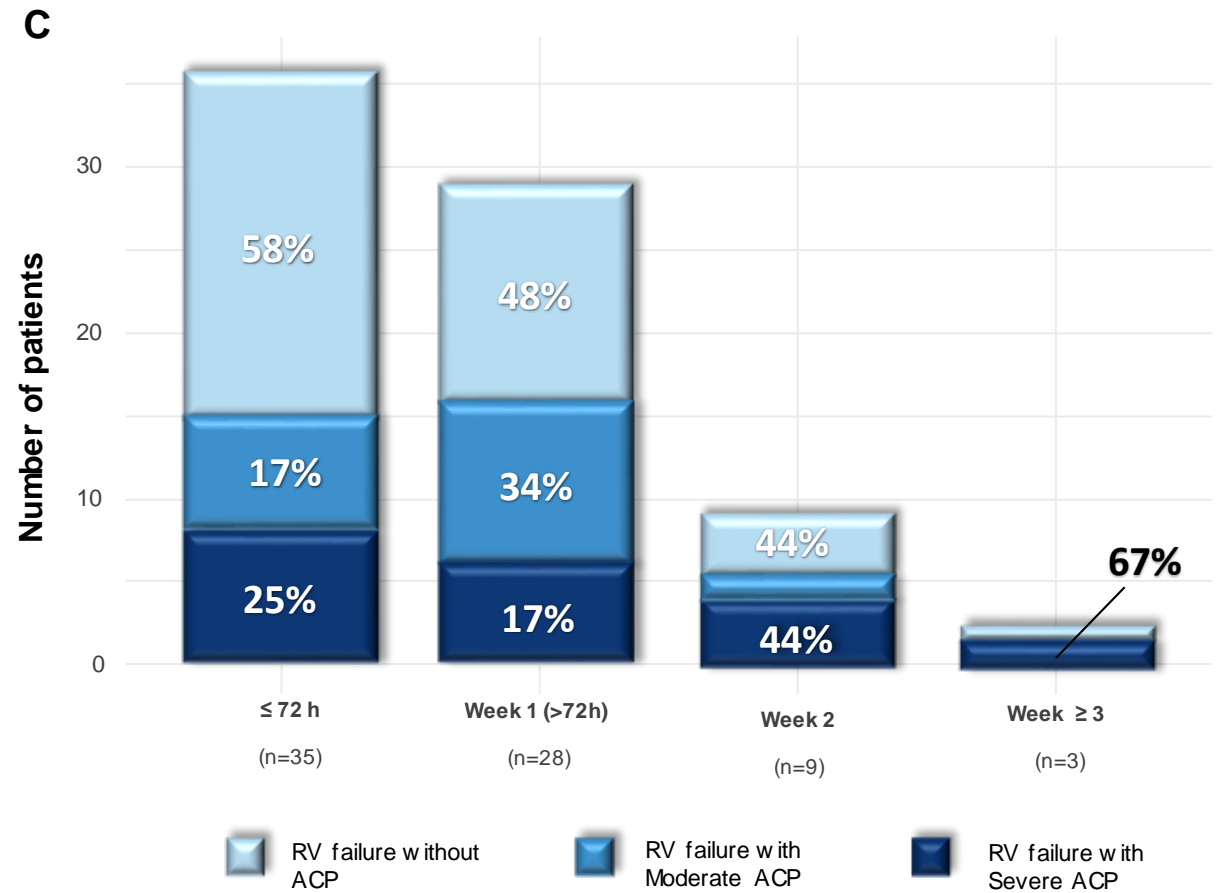

Figure E2

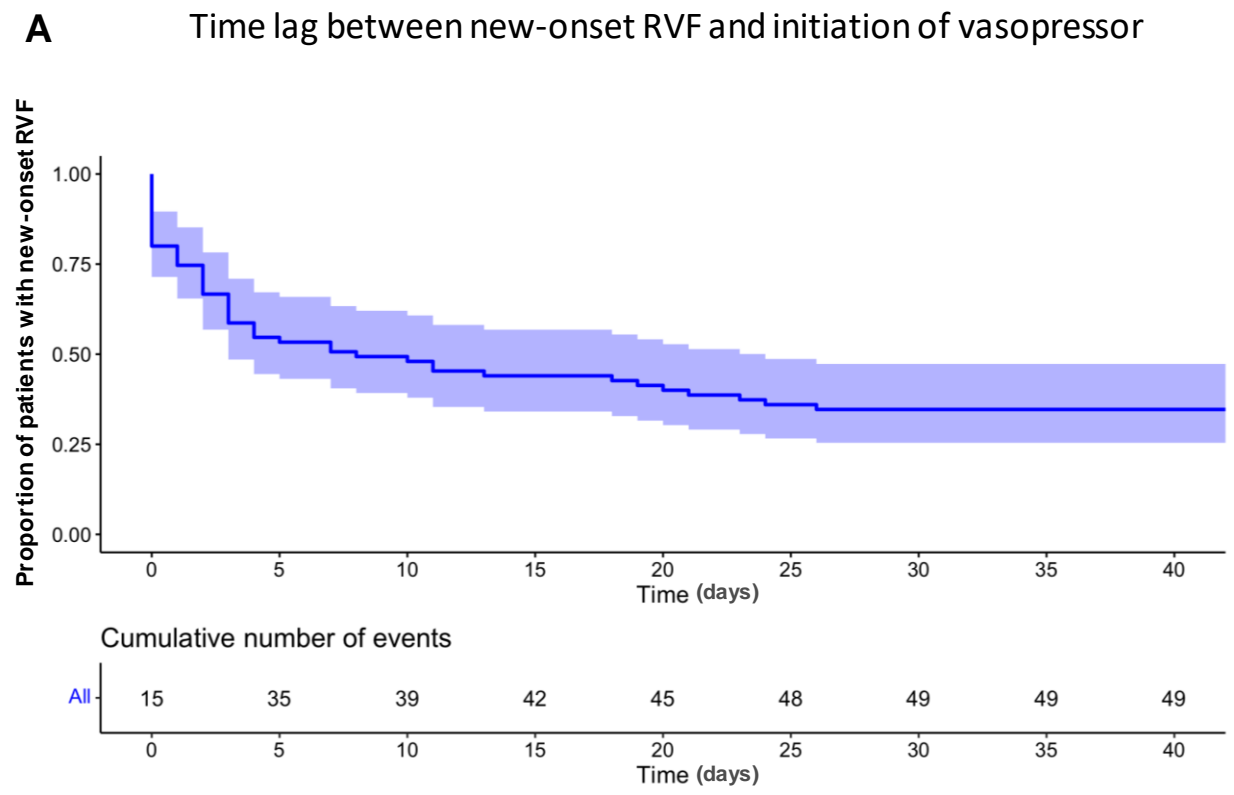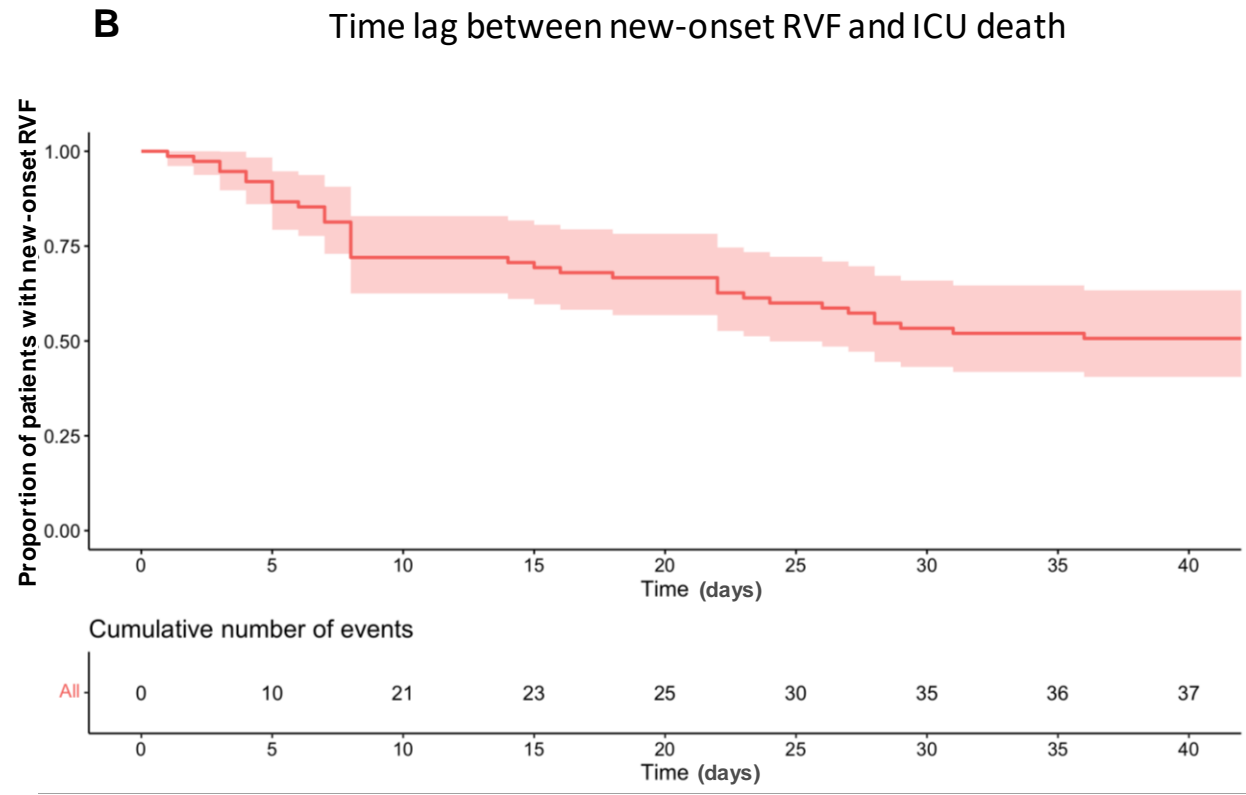

Figure E3

Supplement: 134_2022_6730_MOESM1_ESM.pdf [file 134_2022_6730_MOESM1_ESM.pdf]
